# Supplementary material for: Comparative studies on the therapeutic benefit of targeted α-particle radiation therapy for the treatment of disseminated intraperitoneal disease
Source: Royal Society of Chemistry journal article supplement (doi:10.1039/c7dt01819c), 2017-01-01
Supplement: c7dt01819c1.pdf [file c7dt01819c1.pdf]

Comparative Studies on the Therapeutic Benefit of Targeted  $\alpha$ -Particle Radiation Therapy for the  
Treatment of Disseminated Intraperitoneal Disease

Diane E. Milenic<sup>1,2</sup>, Kwamena E. Baidoo<sup>1</sup>, Young-Seung Kim<sup>1</sup>, Rachel Barkley<sup>1</sup>, and Martin W.  
Brechtel<sup>1</sup>

<sup>1</sup> Radioimmune & Inorganic Chemistry Section, Radiation Oncology Branch, Center for Cancer  
Research, National Cancer Institute, National Institutes of Health, Bethesda MD

<sup>2</sup>To whom correspondence should be addressed:

Diane E. Milenic  
National Institutes of Health  
10 Center Drive, MSC-1002  
Building 10, Room B3B69  
Bethesda, MD 20892  
e-mail: [milenicd@mail.nih.gov](mailto:milenicd@mail.nih.gov)

## Supplementary Information

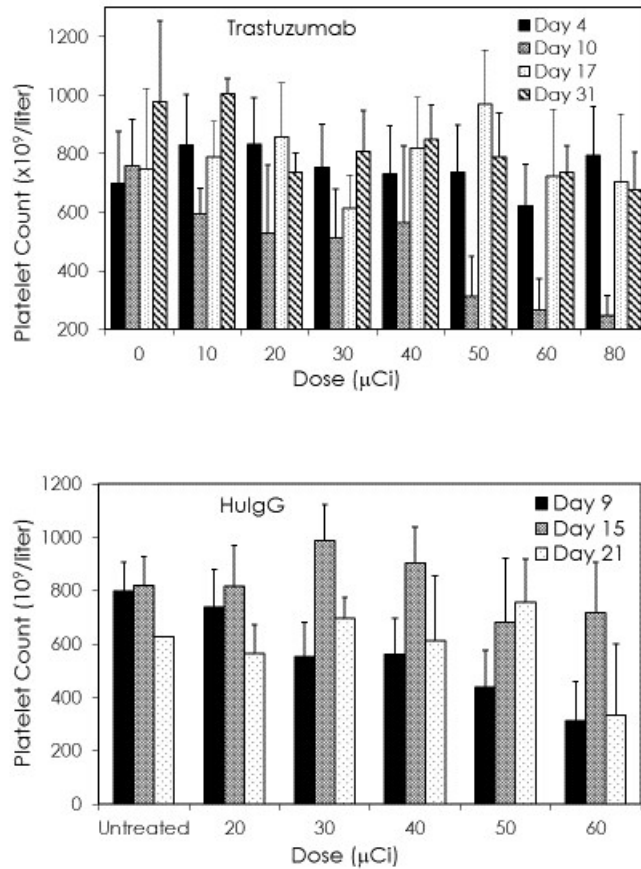

Figure S1 Effect of increasing doses (μCi) of <sup>211</sup>At-RIT on platelet levels. Athymic mice bearing 3 d i.p. LS-174T tumor xenografts were injected with 10, 20, 30, 40, 50, 60 or 80 μCi of <sup>211</sup>At-trastuzumab. Additional groups of mice were treated with 20, 30, 40, 50 or 60 μCi of <sup>211</sup>At-HuligG. Bloods (50 μL) were collected from 5 mice in each group, diluted 1:1 with K-EDTA (1.5mg/mL) and cell counts analyzed on a VetScan VM5.

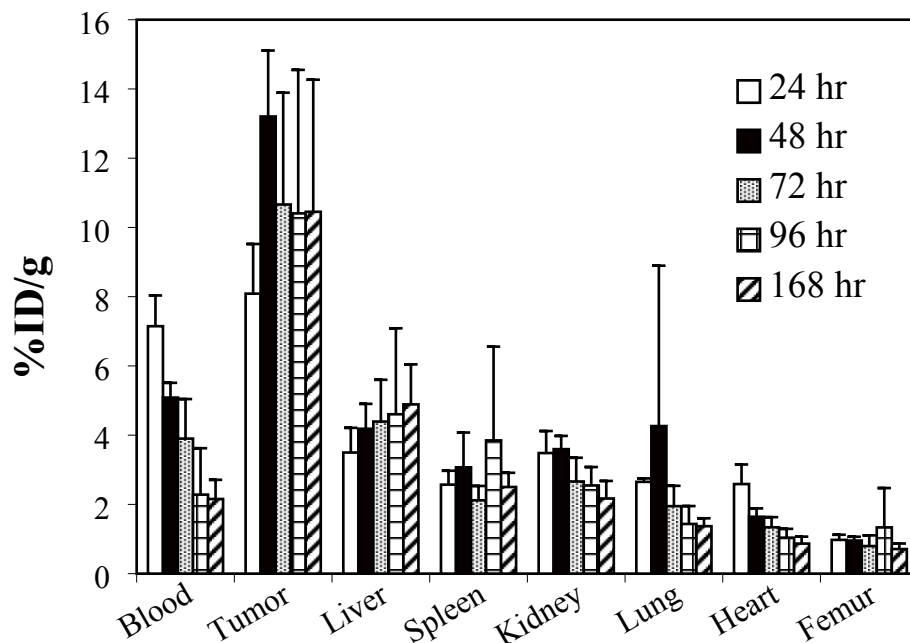

Figure S2 Tumor targeting and normal organ distribution of  $^{111}\text{In}$ -trastuzumab. Athymic mice bearing s.c. LS-174T tumor xenografts were injected with i.v. with  $^{111}\text{In}$ -trastuzumab ( $\sim 5 \mu\text{Ci}$ ) when tumors were 0.2-0.4 mm in diameter. The mice were euthanized at 24, 48, 72, 96, and 168 h by  $\text{CO}_2$  inhalation for harvesting of the blood, tumor, and major organs. The tumor and normal organs were wet-weighed and counted in a  $\gamma$ -scintillation counter. The percent injected dose per gram ( $\% \text{ID g}^{-1}$ ) was determined for each tissue; the averages and standard deviations are presented.

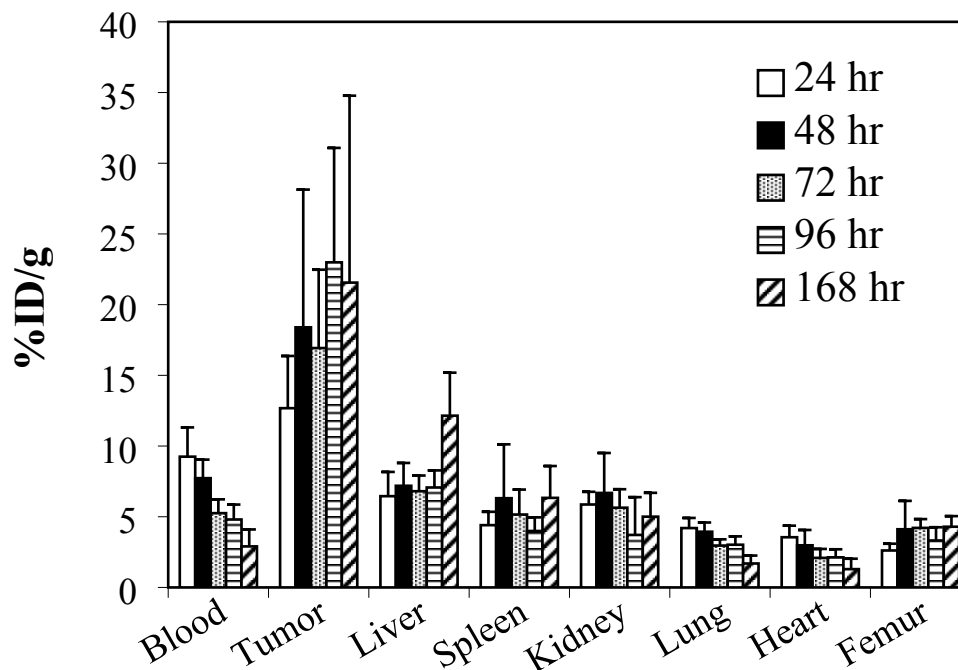

Figure S3 Tumor targeting and normal organ distribution of  $^{111}\text{In}$ -trastuzumab. Athymic mice bearing s.c. LS-174T tumor xenografts were injected with i.v. with  $^{227}\text{Th}$ -trastuzumab ( $\sim 0.5 \mu\text{Ci}$ ) when tumors were 0.2-0.4 mm in diameter. The mice were euthanized at 24, 48, 72, 96, and 168 h by  $\text{CO}_2$  inhalation for harvesting of the blood, tumor, and major organs. The tumor and normal organs were wet-weighed and stored at  $-20^\circ\text{C}$  for 2 mo to allow for equilibrium to be reached. After 2 mo, the samples were counted in a  $\gamma$ -scintillation counter. The percent injected dose per gram ( $\% \text{ID g}^{-1}$ ) was determined for each tissue; the averages and standard deviations are presented.

**Table S1.** Effect of Increasing  $^{211}\text{At}$ -Radioimmunotherapy Doses on the Weights of Athymic Mice Bearing i.p. LS174T Tumor Xenografts.

| RIT         | Dose (μCi) | Days Post Radioimmunotherapy |          |          |          |          |          |          |          |
|-------------|------------|------------------------------|----------|----------|----------|----------|----------|----------|----------|
|             |            | 0                            | 5        | 10       | 13       | 17       | 21       | 27       | 33       |
| None        | None       | 24.7±1.7                     | 25.0±1.9 | 25.6±2.3 | 25.0±2.6 | 24.3±0.5 | 24.9±1.8 | 25.0±1.2 | 25.5     |
| Trastuzumab | 10         | 25.5±1.5                     | 24.5±1.4 | 25.6±1.5 | 24.6±1.6 | 24.8±2.0 | 24.5±1.0 | 25.3±1.6 | 23.7±1.4 |
|             | 20         | 25.5±1.7                     | 24.3±2.4 | 23.9±3.0 | 24.3±2.5 | 25.0±1.3 | 25.6±1.7 | 25.5±1.8 | 24.5±1.9 |
|             | 30         | 26.4±1.6                     | 24.7±1.9 | 23.9±2.4 | 24.0±2.2 | 23.4±2.5 | 23.3±2.3 | 25.0±2.7 | 24.3±3.7 |
|             | 40         | 25.6±2.3                     | 23.4±2.8 | 22.7±2.6 | 22.4±2.6 | 22.5±2.6 | 22.2±2.7 | 23.7±2.5 | 23.1±2.5 |
|             | 50         | 25.9±2.4                     | 22.1±3.0 | 23.0±2.6 | 23.1±2.8 | 24.0±3.0 | 24.7±3.2 | 25.4±2.9 | 24.6±3.2 |
|             | 60         | 26.5±2.5                     | 22.7±3.5 | 23.7±3.1 | 24.3±2.0 | 25.0±2.4 | 25.3±1.6 | 26.9±1.7 | 25.9±1.9 |
|             | 80         | 25.9±2.5                     | 20.3±3.3 | 21.5±2.6 | 21.5±2.3 | 21.6±2.1 | 22.9±1.3 | 24.3±1.7 | 25.1±2.4 |
|             |            |                              |          |          |          |          |          |          |          |
| RIT         | Dose (μCi) | Days Post Radioimmunotherapy |          |          |          |          |          |          |          |
|             |            | 0                            | 6        | 11       | 18       | 20       |          |          |          |
| None        | None       | 29.2±3.7                     | 29.4±3.5 | 31.0±2.9 | 26.9     |          |          |          |          |
| HulgG       | 20         | 28.3±2.1                     | 26.9±2.2 | 26.7±2.2 | 27.5±1.2 | 27.5±2.1 |          |          |          |
|             | 30         | 28.8±1.7                     | 26.2±1.6 | 26.4±2.0 | 27.5±2.3 | 27.5±1.5 |          |          |          |
|             | 40         | 27.2±2.1                     | 24.3±2.5 | 23.6±2.3 | 26.1±1.8 | 26.1±2.4 |          |          |          |
|             | 50         | 27.8±1.9                     | 22.5±7.4 | 24.2±2.0 | 25.3±2.3 | 25.4±1.4 |          |          |          |
|             | 60         | 26.8±1.4                     | 21.0±3.0 | 22.3±0.8 | 24.6±0.3 | 23.6±0.8 |          |          |          |

Athymic mice (n=9-15) bearing 3 d i.p. LS-174T tumor xenografts were injected with doses of  $^{211}\text{At}$ -trastuzumab from 10-80  $\mu\text{Ci}$  to establish the effective, suboptimal, therapeutic dose for subsequent studies with chemotherapeutics. Animal weights were monitored 1-2 times per week for 5 weeks as an indicator of toxicity. Additional groups included those that received no treatment and those that were injected with 20, 30, 40 or 60  $\mu\text{Ci}$  of the non-specific control,  $^{211}\text{At}$ -HuIgG.

**Table S2.** Effect of Increasing  $^{211}\text{At}$ -Radioimmunotherapy Doses on the Weights of Athymic Mice Bearing i.p. LS174T Tumor Xenografts.

| RIT         | Dose ( $\mu\text{Ci}$ ) | Days Post Radioimmunotherapy |                |                |                |                |                |                |                |
|-------------|-------------------------|------------------------------|----------------|----------------|----------------|----------------|----------------|----------------|----------------|
|             |                         | -1                           | 7              | 12             | 15             | 19             | 22             | 28             | 32             |
| None        | None                    | 22.6 $\pm$ 2.0               | 23.3 $\pm$ 2.3 | 23.7 $\pm$ 4.7 | 23.9 $\pm$ 3.8 | 25.2 $\pm$ 4.8 | 29.4           | 29.1           | 28.3           |
| Trastuzumab | 20                      | 24.1 $\pm$ 2.6               | 22.3 $\pm$ 2.1 | 21.6 $\pm$ 2.2 | 21.8 $\pm$ 2.1 | 22.6 $\pm$ 2.4 | 22.5 $\pm$ 2.6 | 23.4 $\pm$ 2.2 | 24.1 $\pm$ 2.6 |
|             | 30                      | 23.7 $\pm$ 1.5               | 21.5 $\pm$ 1.6 | 20.9 $\pm$ 1.8 | 21.5 $\pm$ 2.0 | 22.3 $\pm$ 2.1 | 21.8 $\pm$ 2.4 | 21.4 $\pm$ 2.2 | 22.2 $\pm$ 2.0 |
|             | 40                      | 24.3 $\pm$ 2.7               | 21.3 $\pm$ 3.2 | 21.4 $\pm$ 3.0 | 21.7 $\pm$ 3.0 | 22.0 $\pm$ 3.2 | 21.5 $\pm$ 3.1 | 21.1 $\pm$ 3.2 | 21.5 $\pm$ 3.9 |
| RIT         | Dose ( $\mu\text{Ci}$ ) | Days Post Radioimmunotherapy |                |                |                |                |                |                |                |
|             |                         | 0                            | 4              | 7              | 11             | 14             | 20             | 24             | 27             |
| None        | None                    | 24.4 $\pm$ 1.8               | 23.8 $\pm$ 2.1 | 24.6 $\pm$ 1.9 | 25.1 $\pm$ 2.4 | 26.2 $\pm$ 2.0 |                |                |                |
| HuIgG       | 20                      | 24.8 $\pm$ 2.3               | 22.9 $\pm$ 2.3 | 23.3 $\pm$ 2.3 | 23.4 $\pm$ 2.5 | 23.5 $\pm$ 2.8 | 24.4 $\pm$ 3.7 |                |                |
|             | 30                      | 24.5 $\pm$ 2.1               | 21.9 $\pm$ 2.0 | 21.6 $\pm$ 1.9 | 21.9 $\pm$ 2.3 | 21.7 $\pm$ 2.5 | 22.0 $\pm$ 1.8 | 23.3 $\pm$ 3.1 | 21.9           |
|             | 40                      | 23.1 $\pm$ 5.2               | 20.6 $\pm$ 4.7 | 20.0 $\pm$ 4.6 | 20.3 $\pm$ 4.6 | 20.5 $\pm$ 4.8 | 20.9 $\pm$ 6.0 | 20.5 $\pm$ 6.8 | 22.3 $\pm$ 0.6 |

Athymic mice (n=15-30) bearing 3 d i.p. LS-174T tumor xenografts were injected with 20, 30 or 40  $\mu\text{Ci}$   $^{211}\text{At}$ -trastuzumab to validate the effective, suboptimal, therapeutic dose for subsequent studies with chemotherapeutics. Animal weights were monitored 1-2 times per week for ~5 weeks as an indicator of toxicity. Additional groups included those that received no treatment and those that were injected with 20, 30, or 40  $\mu\text{Ci}$  of the non-specific control,  $^{211}\text{At}$ -HuIgG.

**Table S3.** Tumor targeting and normal organ distribution of  $^{111}\text{In}$ -trastuzumab following i.v. administration in athymic mice bearing s.c. LS-174T xenografts

| Tissue | Time points (d) |            |            |            |            |
|--------|-----------------|------------|------------|------------|------------|
|        | 24              | 48         | 72         | 96         | 168        |
| Blood  | 7.15±0.89       | 5.09±0.43  | 3.90±1.14  | 2.28±1.34  | 2.16±0.55  |
| Tumor  | 8.09±1.43       | 13.20±1.91 | 10.66±3.23 | 10.41±4.15 | 10.45±3.82 |
| Liver  | 3.50±0.71       | 4.18±0.72  | 4.39±1.21  | 4.60±2.48  | 4.89±1.16  |
| Spleen | 2.57±0.40       | 3.07±1.00  | 2.12±0.42  | 3.85±2.71  | 2.50±0.41  |
| Kidney | 3.48±0.64       | 3.60±0.38  | 2.66±0.69  | 2.55±0.53  | 2.17±0.51  |
| Lung   | 2.65±0.10       | 4.26±4.63  | 1.95±0.59  | 1.44±0.52  | 1.37±0.23  |
| Heart  | 2.59±0.57       | 1.64±0.24  | 1.34±0.29  | 1.04±0.25  | 0.87±0.20  |
| Femur  | 0.97±0.15       | 0.96±0.11  | 0.80±0.31  | 1.34±1.14  | 0.71±0.16  |

Athymic mice bearing s.c. LS-174T xenografts and non-tumor bearing mice were injected (i.v.) with  $^{111}\text{In}$ -trastuzumab (~7.5  $\mu\text{Ci}$ ). The mice were sacrificed by exsanguination, the blood and tissues were harvested, wet-weighed and the radioactivity measured. The values represent the average percent injected dose per gram of tissue (%ID/g). The standard deviations were also calculated and are given in parentheses.

**Table S4.** Tumor targeting and normal organ distribution of  $^{227}\text{Th}$ -trastuzumab following i.v. administration in athymic mice bearing s.c. LS-174T xenografts

| Tissue | Time points (d) |            |            |            |             |
|--------|-----------------|------------|------------|------------|-------------|
|        | 24              | 48         | 72         | 96         | 168         |
| Blood  | 9.25±2.07       | 7.73±1.31  | 5.25±0.98  | 4.80±1.06  | 2.90±1.20   |
| Tumor  | 12.68±3.69      | 18.40±9.74 | 16.93±5.54 | 22.99±8.09 | 21.56±13.22 |
| Liver  | 6.45±1.71       | 7.19±1.62  | 6.80±1.11  | 7.07±1.21  | 12.15±3.04  |
| Spleen | 4.40±0.94       | 6.31±3.81  | 5.16±1.77  | 3.99±0.96  | 6.33±2.25   |
| Kidney | 5.87±0.90       | 6.68±2.83  | 5.64±1.31  | 3.71±2.67  | 5.01±1.69   |
| Lung   | 4.20±0.72       | 3.94±0.65  | 2.96±0.44  | 3.02±0.59  | 1.69±0.56   |
| Heart  | 3.55±0.82       | 2.98±1.08  | 2.09±0.63  | 2.13±0.57  | 1.29±0.74   |
| Femur  | 2.61±0.48       | 4.11±2.01  | 4.21±0.62  | 3.32±0.94  | 4.29±0.75   |

Athymic mice bearing s.c. LS-174T xenografts and non-tumor bearing mice were injected (i.v.) with  $^{227}\text{Th}$ -trastuzumab (~7.5  $\mu\text{Ci}$ ). The mice were sacrificed by exsanguination, the blood and tissues were harvested, wet-weighted and the radioactivity measured. The values represent the average percent injected dose per gram of tissue (%ID/g). The standard deviations were also calculated and are given in parentheses.

**Table S5.** Effect of Increasing  $^{227}\text{Th}$ -Radioimmunotherapy Doses on the Weights of Athymic Mice Bearing i.p. LS174T Tumor Xenografts.

| RIT | Dose | Days Post Radioimmunotherapy |   |    |    |    |    |
|-----|------|------------------------------|---|----|----|----|----|
|     |      | 0                            | 7 | 11 | 14 | 18 | 27 |



|             |                            |                |                |                |                |                |                |
|-------------|----------------------------|----------------|----------------|----------------|----------------|----------------|----------------|
| None        | ( $\mu\text{Ci}$ )<br>None | 26.8 $\pm$ 2.7 | 27.7 $\pm$ 2.7 | 28.0 $\pm$ 4.0 |                |                |                |
| Trastuzumab | 0.25                       | 28.0 $\pm$ 2.4 | 26.7 $\pm$ 2.2 | 26.3 $\pm$ 2.2 | 25.8 $\pm$ 2.4 | 25.6 $\pm$ 2.3 | 27.5 $\pm$ 1.1 |
|             | 0.5                        | 28.2 $\pm$ 2.1 | 25.8 $\pm$ 2.4 | 26.0 $\pm$ 2.9 | 25.7 $\pm$ 3.7 | 26.2 $\pm$ 3.5 |                |
|             | 1.0                        | 28.2 $\pm$ 2.7 | 25.5 $\pm$ 2.3 | 24.4 $\pm$ 4.0 | 24.8 $\pm$ 3.0 | 25.6 $\pm$ 2.0 |                |
|             | 2.0                        | 27.9 $\pm$ 1.6 | 25.2 $\pm$ 1.1 | 22.8 $\pm$ 2.1 | 21.9           |                |                |
|             | 5.0                        | 28.2 $\pm$ 2.5 | 23.9 $\pm$ 2.7 |                |                |                |                |
| Panitumumab | 0.25                       | 26.4 $\pm$ 1.8 | 24.8 $\pm$ 1.3 | 25.3 $\pm$ 1.2 | 25.0 $\pm$ 1.8 | 24.3 $\pm$ 0.4 | 26.1           |
|             | 0.5                        | 28.5 $\pm$ 1.9 | 26.0 $\pm$ 1.7 | 26.3 $\pm$ 1.5 | 26.0 $\pm$ 1.8 | 26.5 $\pm$ 1.6 | 27.3 $\pm$ 2.3 |
|             | 1.0                        | 28.1 $\pm$ 2.5 | 25.5 $\pm$ 2.8 | 24.9 $\pm$ 3.0 | 23.6 $\pm$ 2.2 | 25.5 $\pm$ 2.7 | 25.0 $\pm$ 2.9 |
|             | 2.0                        | 28.0 $\pm$ 0.9 | 25.5 $\pm$ 1.3 | 24.7 $\pm$ 1.7 | 23.8 $\pm$ 1.9 | 24.9 $\pm$ 1.3 | 22.7 $\pm$ 3.1 |
|             | 5.0                        | 28.6 $\pm$ 2.3 | 25.3 $\pm$ 2.3 | 20.2 $\pm$ 1.8 |                |                |                |
| HuM195      | 0.25                       | 27.7 $\pm$ 1.2 | 28.2 $\pm$ 1.1 | 29.5 $\pm$ 2.3 | 29.1 $\pm$     |                |                |
|             | 0.5                        | 26.9 $\pm$ 2.7 | 26.9 $\pm$ 2.8 | 26.8 $\pm$ 2.0 | 24.9 $\pm$ 1.4 | 24.3 $\pm$ 1.1 | 24.7 $\pm$ 1.1 |
|             | 1.0                        | 26.0 $\pm$ 2.0 | 25.1 $\pm$ 2.4 | 25.5 $\pm$ 1.5 | 27.0           | 26.7           | 26.7           |
|             | 2.0                        | 27.6 $\pm$ 1.6 | 26.7 $\pm$ 2.3 | 26.0 $\pm$ 2.3 | 24.9           |                |                |
|             | 5.0                        | 27.8 $\pm$ 1.5 | 26.0 $\pm$ 1.6 | 22.8 $\pm$ 2.6 |                |                |                |

Athymic mice (n=10) bearing 3 d i.p. LS-174T tumor xenografts were injected with doses of  $^{227}\text{Th}$ -trastuzumab or  $^{227}\text{Th}$ -panitumumab from 0.25-5.0  $\mu\text{Ci}$  to establish the effective, suboptimal, therapeutic dose for subsequent studies with chemotherapeutics. Animal weights were monitored 1-2 times per week for 4 weeks as an indicator of toxicity. Additional groups included those that received no treatment and those that were injected with the non-specific control,  $^{227}\text{Th}$ -HuM195.
